# Supplementary material
Source: PubMed Central journal article supplement (PMC6893878)
Supplement: NIHMS1059932-supplement-1.pdf [file NIHMS1059932-supplement-1.pdf]

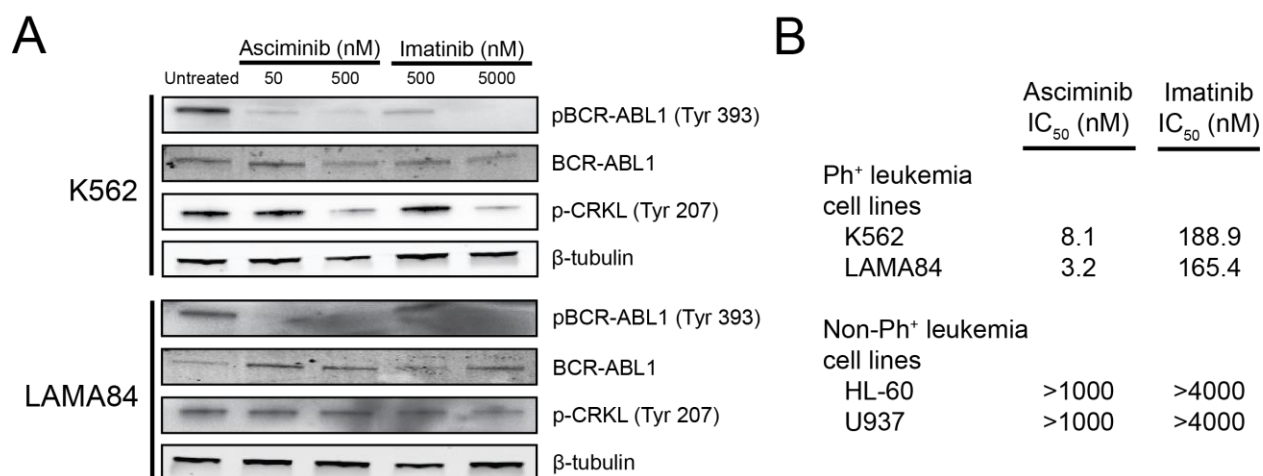

**Figure S1. Immunoblot analysis of BCR-ABL1 signaling and cellular proliferation IC<sub>50</sub> summary**

**following asciminib treatment in human Ph<sup>+</sup> and non-Ph<sup>+</sup> leukemia cell lines, related to Figure 1. (A)**

Effects of asciminib and imatinib on BCR-ABL1 signaling in human Ph<sup>+</sup> leukemia cell lines by immunoblot. K562 and LAMA84 cells were treated with the indicated concentrations of asciminib or imatinib for 6 h, lysed and subjected to SDS-PAGE, and probed with antibodies for phospho-ABL1, total ABL1, and β-tubulin. **(B)** IC<sub>50</sub> values for asciminib and imatinib in human leukemia cell lines. Two Ph<sup>+</sup> (K562, LAMA84) and two non-Ph<sup>+</sup> (HL-60, U937) cell lines were distributed into 384-well plates in graded concentrations of each inhibitor (asciminib: 0-1000 nM; imatinib: 0-4000 nM), cultured for 72 h, and analyzed by microplate reader using a standard MTS-based colorimetric assay. Response curves were analyzed by non-linear regression and IC<sub>50</sub> values computed using Graphpad Prism software. Values represent the mean of three independent experiments performed in quadruplicate.

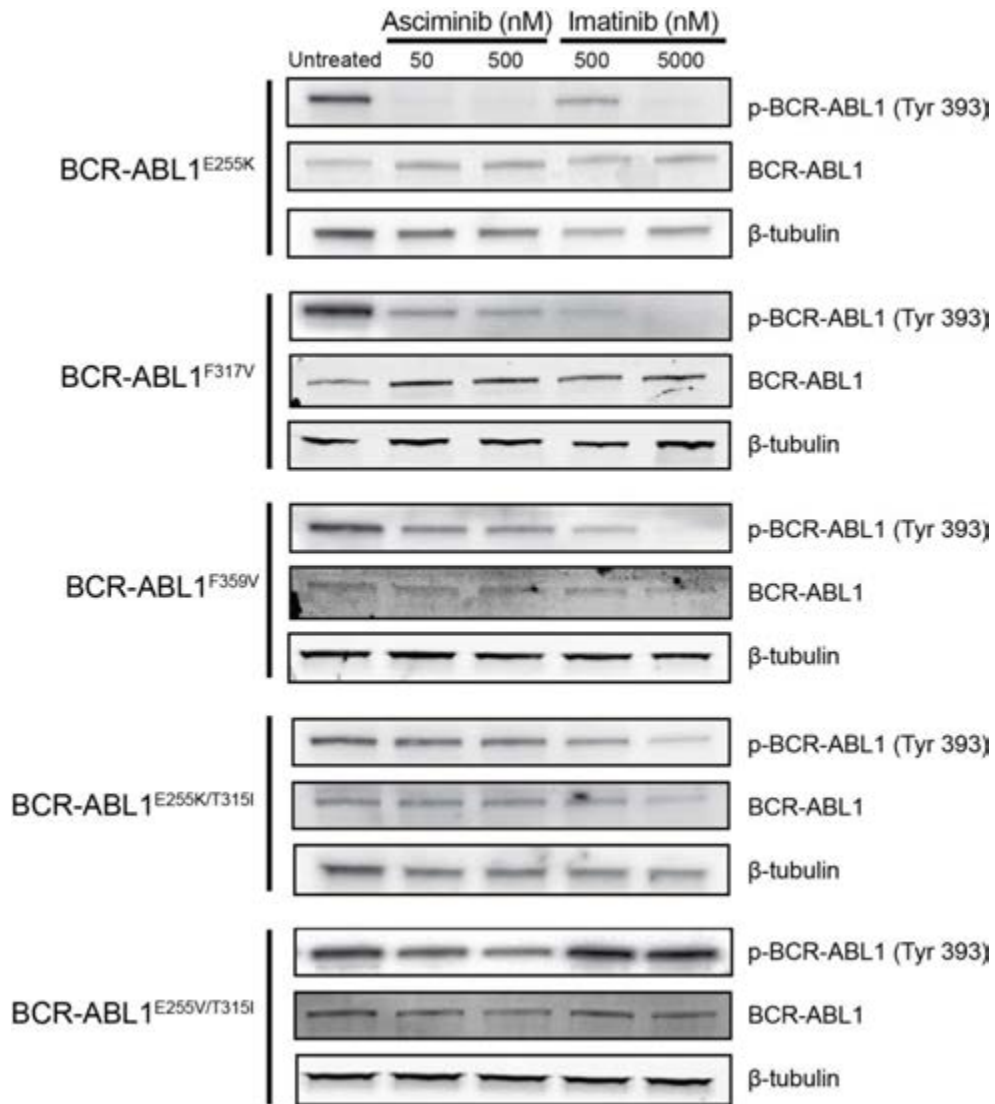

**Figure S2. Immunoblot analysis of BCR-ABL1 signaling following asciminib treatment in expanded panel of BCR-ABL1 single and compound mutants, related to Figure 2.** Ba/F3 cells expressing the indicated single or compound mutant pSRα BCR-ABL1 constructs were treated with the indicated concentrations of asciminib or imatinib for 6 h, lysed and subjected to SDS-PAGE, and probed with antibodies for phospho-ABL1, total ABL1, or β-tubulin.

**Table S1. Cellular proliferation IC<sub>50</sub> values for asciminib for all Ba/F3 BCR-ABL1 single mutant cell lines, related to Figures 2 and 3.**

| Cell line             | Vector       | Asciminib IC <sub>50</sub> , nM ± SEM |
|-----------------------|--------------|---------------------------------------|
| Ba/F3 Parental        | ---          | >10000                                |
| Ba/F3 native BCR-ABL1 | MIG          | 3.8 ± 0.5                             |
| Ba/F3 BCR-ABL1 G250E  | MIG          | 22.0 ± 1.9                            |
| Ba/F3 BCR-ABL1 Y253H  | MIG          | 19.5 ± 10.2                           |
| Ba/F3 BCR-ABL1 E255V  | MIG          | 13.3 ± 0.5                            |
| Ba/F3 BCR-ABL1 F311I  | MIG          | 142.1 ± 24.1                          |
| Ba/F3 BCR-ABL1 T315I  | MIG          | 28.7 ± 4.5                            |
| Ba/F3 BCR-ABL1 F317L  | MIG          | 364.6 ± 156.4                         |
| Ba/F3 BCR-ABL1 A337V  | MIG          | >2500                                 |
| Ba/F3 BCR-ABL1 F359C  | MIG          | >2500                                 |
| Ba/F3 BCR-ABL1 F359I  | MIG          | >2500                                 |
| Ba/F3 BCR-ABL1 F359V  | MIG          | >2500                                 |
| Ba/F3 BCR-ABL1 H396R  | MIG          | 16.0 ± 0.5                            |
| Ba/F3 BCR-ABL1 P465S  | MIG          | >2500                                 |
| Ba/F3 BCR-ABL1 V468F  | MIG          | >2500                                 |
| Ba/F3 native BCR-ABL1 | pSR $\alpha$ | 4.5 ± 1.6                             |
| Ba/F3 BCR-ABL1 G250E  | pSR $\alpha$ | 5.4 ± 3.7                             |
| Ba/F3 BCR-ABL1 Q252H  | pSR $\alpha$ | 14.9 ± 2.9                            |
| Ba/F3 BCR-ABL1 Y253F  | pSR $\alpha$ | 3.4 ± 3.3                             |
| Ba/F3 BCR-ABL1 Y253H  | pSR $\alpha$ | 11.4 ± 6.1                            |
| Ba/F3 BCR-ABL1 E255K  | pSR $\alpha$ | 9.5 ± 2.5                             |
| Ba/F3 BCR-ABL1 E255V  | pSR $\alpha$ | 3.4 ± 0.8                             |
| Ba/F3 BCR-ABL1 T315A  | pSR $\alpha$ | 4.6 ± 5.9                             |
| Ba/F3 BCR-ABL1 T315I  | pSR $\alpha$ | 137.3 ± 32.2                          |
| Ba/F3 BCR-ABL1 F317L  | pSR $\alpha$ | 17.4 ± 3.9                            |
| Ba/F3 BCR-ABL1 F317V  | pSR $\alpha$ | 113.5 ± 5.4                           |
| Ba/F3 BCR-ABL1 A344P  | pSR $\alpha$ | 2666 ± 3.5                            |
| Ba/F3 BCR-ABL1 M351T  | pSR $\alpha$ | 28.1 ± 20.8                           |
| Ba/F3 BCR-ABL1 F359V  | pSR $\alpha$ | 40.2 ± 1.2                            |
| Ba/F3 BCR-ABL1 P465S  | pSR $\alpha$ | 1448 ± 13.6                           |

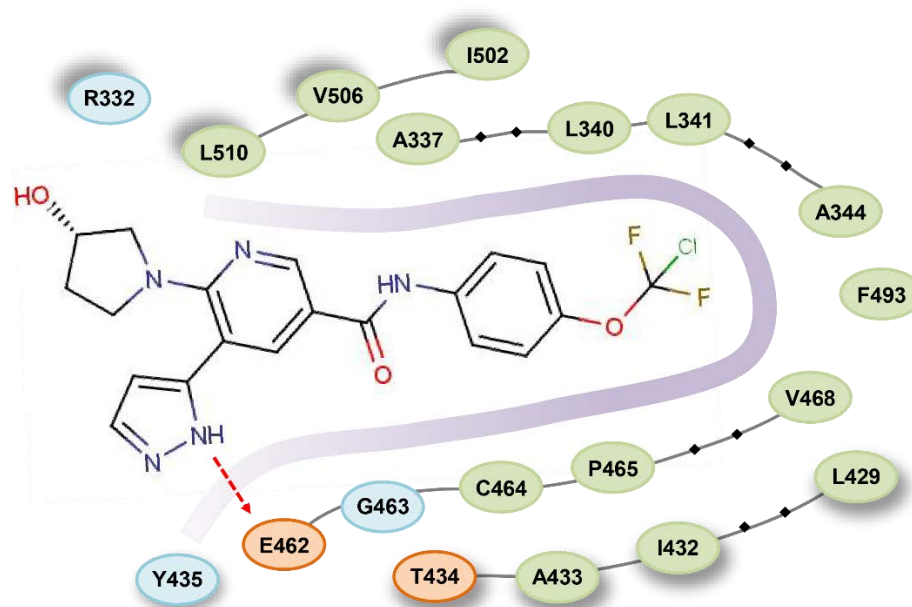

**Figure S3.** Network of protein residues of the asciminib-binding site, related to Figure 3. Select residues which comprise the myristoyl-binding pocket (stylized by purple line) are indicated according to relative 3D-structural proximity to one another and to the chemical structure of asciminib bound to ABL1 kinase.

**Table S2. Summary of cell-based resistance screen for single-agent asciminib starting from Ba/F3 pSR $\alpha$  BCR-ABL1 cells, related to Figure 3.**

| Treatment condition | Total wells surveyed, n | Wells with outgrowth, n (%) | Clones sequenced, n | Mutant(s) recovered | n  | Frequency among all clones (%) | Frequency among mutated clones (%) |
|---------------------|-------------------------|-----------------------------|---------------------|---------------------|----|--------------------------------|------------------------------------|
| Asciminib 25 nM     | 96                      | 91                          | 36                  | Native BCR-ABL1     | 36 | 100                            | ---                                |
| Asciminib 50 nM     | 96                      | 49                          | 27                  | Native BCR-ABL1     | 27 | 100                            | ---                                |
| Asciminib 100 nM    | 96                      | 38                          | 24                  | Native BCR-ABL1     | 24 | 100                            | ---                                |
| Asciminib 200 nM    | 96                      | 21                          | 21                  | Native BCR-ABL1     | 21 | 100                            | ---                                |
| Asciminib 400 nM    | 96                      | 25                          | 25                  | Native BCR-ABL1     | 22 | 88                             | ---                                |
|                     |                         |                             |                     | L1057M              | 1  | 4                              | 33.3                               |
|                     |                         |                             |                     | Y1064F              | 1  | 4                              | 33.3                               |
|                     |                         |                             |                     | R1099G              | 1  | 4                              | 33.3                               |
| Asciminib 800 nM    | 96                      | 31                          | 31                  | Native BCR-ABL1     | 27 | 87.1                           | ---                                |
|                     |                         |                             |                     | Y342C               | 2  | 6.5                            | 50                                 |
|                     |                         |                             |                     | A344P               | 1  | 3.2                            | 25                                 |
|                     |                         |                             |                     | F1066L              | 1  | 3.2                            | 25                                 |
| Asciminib 1600 nM   | 96                      | 24                          | 24                  | Native BCR-ABL1     | 17 | 70.8                           | ---                                |
|                     |                         |                             |                     | A344P               | 2  | 8.3                            | 28.6                               |
|                     |                         |                             |                     | Y353C               | 1  | 4.2                            | 14.2                               |
|                     |                         |                             |                     | P465S               | 2  | 8.3                            | 28.6                               |
|                     |                         |                             |                     | G671R               | 2  | 8.3                            | 28.6                               |

**Table S3. Summary of cell-based resistance screens of asciminib alone or in combination with ponatinib starting from Ba/F3 MIG BCR-ABL1 cells, related to Figure 3.**

| Treatment condition               | Total wells surveyed, n | Wells with outgrowth, n (%) | Clones sequenced, n | Mutant(s) recovered | n  | Frequency among all clones (%) | Frequency among mutated clones (%) |
|-----------------------------------|-------------------------|-----------------------------|---------------------|---------------------|----|--------------------------------|------------------------------------|
| Asciminib 200 nM                  | 960                     | 87                          | 87                  | Native BCR-ABL1     | 43 | 49.4                           | ---                                |
|                                   |                         |                             |                     | V225G               | 1  | 1.1                            | 2.3                                |
|                                   |                         |                             |                     | Y226N               | 1  | 1.1                            | 2.3                                |
|                                   |                         |                             |                     | V228E               | 2  | 2.3                            | 4.5                                |
|                                   |                         |                             |                     | V228S               | 1  | 1.1                            | 2.3                                |
|                                   |                         |                             |                     | L284F               | 2  | 2.3                            | 4.5                                |
|                                   |                         |                             |                     | T315I               | 2  | 2.3                            | 4.5                                |
|                                   |                         |                             |                     | F317C               | 1  | 1.1                            | 2.3                                |
|                                   |                         |                             |                     | V338A               | 1  | 1.1                            | 2.3                                |
|                                   |                         |                             |                     | V338E               | 1  | 1.1                            | 2.3                                |
|                                   |                         |                             |                     | L340Q               | 1  | 1.1                            | 2.3                                |
|                                   |                         |                             |                     | L340R               | 1  | 1.1                            | 2.3                                |
|                                   |                         |                             |                     | Y342C               | 1  | 1.1                            | 2.3                                |
|                                   |                         |                             |                     | Y342D               | 1  | 1.1                            | 2.3                                |
|                                   |                         |                             |                     | Y342N               | 1  | 1.1                            | 2.3                                |
|                                   |                         |                             |                     | A344P               | 6  | 6.9                            | 13.6                               |
|                                   |                         |                             |                     | L354M               | 1  | 1.1                            | 2.3                                |
|                                   |                         |                             |                     | L387S               | 3  | 3.4                            | 6.8                                |
|                                   |                         |                             |                     | G463D               | 1  | 1.1                            | 2.3                                |
|                                   |                         |                             |                     | C464G               | 1  | 1.1                            | 2.3                                |
|                                   |                         |                             |                     | C464W               | 2  | 2.3                            | 4.5                                |
|                                   |                         |                             |                     | V468D               | 3  | 3.4                            | 6.8                                |
|                                   |                         |                             |                     | L471F               | 1  | 1.1                            | 2.3                                |
|                                   |                         |                             |                     | F497L               | 2  | 2.3                            | 4.5                                |
| E499D                             | 1                       | 1.1                         | 2.3                 |                     |    |                                |                                    |
| I502F                             | 1                       | 1.1                         | 2.3                 |                     |    |                                |                                    |
| I502N                             | 1                       | 1.1                         | 2.3                 |                     |    |                                |                                    |
| S503*                             | 1                       | 1.1                         | 2.3                 |                     |    |                                |                                    |
| V506A                             | 1                       | 1.1                         | 2.3                 |                     |    |                                |                                    |
| L510Q                             | 2                       | 2.3                         | 4.5                 |                     |    |                                |                                    |
| Asciminib 10000 nM                | 96                      | 9                           | 9                   | Native BCR-ABL1     | 1  | 11.1                           | ---                                |
|                                   |                         |                             |                     | K294E               | 1  | 11.1                           | 12.5                               |
|                                   |                         |                             |                     | Y342C               | 1  | 11.1                           | 12.5                               |
|                                   |                         |                             |                     | A344P               | 3  | 33.3                           | 37.5                               |
|                                   |                         |                             |                     | A433D               | 1  | 11.1                           | 12.5                               |
|                                   |                         |                             |                     | F497L               | 1  | 11.1                           | 12.5                               |
| S503*                             | 1                       | 11.1                        | 12.5                |                     |    |                                |                                    |
| Ponatinib 10 nM + Asciminib 10 nM | 96                      | 96                          | 24                  | Native BCR-ABL1     | 20 | 83.3                           | ---                                |
|                                   |                         |                             |                     | D276N/E281K         | 4  | 16.7                           | 100.0                              |
| Ponatinib 20 nM + Asciminib 20 nM | 96                      | 45                          | 45                  | Native BCR-ABL1     | 28 | 62.2                           | ---                                |
|                                   |                         |                             |                     | M244I/A288T/D325N   | 4  | 8.9                            | 23.5                               |
|                                   |                         |                             |                     | D276N / E281K       | 1  | 2.2                            | 5.9                                |
|                                   |                         |                             |                     | D276N/E281K/E470K   | 1  | 2.2                            | 5.9                                |
|                                   |                         |                             |                     | T315I               | 8  | 17.8                           | 47.1                               |
|                                   |                         |                             |                     | T315I / G372E       | 1  | 2.2                            | 5.9                                |
| T315I / A424T                     | 2                       | 4.4                         | 11.8                |                     |    |                                |                                    |
| Ponatinib 40 nM + Asciminib 40 nM | 192                     | 36                          | 36                  | Native BCR-ABL1     | 35 | 97.2                           | ---                                |
|                                   |                         |                             |                     | K263E               | 1  | 2.8                            | 100                                |
| Ponatinib                         | 192                     | 33                          | 33                  | Native BCR-ABL1     | 27 | 81.8                           | ---                                |

|                                              |     |    |    |                          |    |      |      |
|----------------------------------------------|-----|----|----|--------------------------|----|------|------|
| 80 nM +<br>Asciminib<br>80 nM                |     |    |    | K263E                    | 2  | 6.1  | 33.3 |
|                                              |     |    |    | M351I                    | 1  | 3.0  | 16.7 |
|                                              |     |    |    | G442E                    | 3  | 9.1  | 50.0 |
| Ponatinib<br>160 nM +<br>Asciminib<br>160 nM | 192 | 22 | 22 | Native BCR-ABL1<br>M318I | 21 | 95.5 | ---  |
|                                              |     |    |    |                          | 1  | 4.5  | 100  |

**Table S4. Summary of cell-based resistance screen for combinations of asciminib and nilotinib or ponatinib starting from Ba/F3 pSR $\alpha$  BCR-ABL1 cells, related to Figure 3.**

| Treatment condition                 | Total wells surveyed, n | Wells with outgrowth, n (%) | Clones sequenced, n | Mutant(s) recovered      | n      | Frequency among all clones (%) | Frequency among mutated clones (%) |
|-------------------------------------|-------------------------|-----------------------------|---------------------|--------------------------|--------|--------------------------------|------------------------------------|
| Nilotinib 50 nM + Asciminib 10 nM   | 96                      | 15                          | 13                  | Native BCR-ABL1          | 7      | 53.8                           | ---                                |
|                                     |                         |                             |                     | Q252H                    | 2      | 15.4                           | 33.3                               |
|                                     |                         |                             |                     | E255K                    | 1      | 7.7                            | 16.7                               |
|                                     |                         |                             |                     | T315I                    | 3      | 23.1                           | 42.9                               |
|                                     |                         |                             |                     | L818F                    | 1      | 7.7                            | 16.7                               |
| Nilotinib 50 nM + Asciminib 25 nM   | 96                      | 4                           | 4                   | Native BCR-ABL1<br>T315I | 2<br>2 | 50<br>50                       | ---<br>100                         |
| Nilotinib 50 nM + Asciminib 50 nM   | 96                      | 6                           | 6                   | Native BCR-ABL1<br>T315I | 1<br>5 | 16.7<br>83.3                   | ---<br>100                         |
| Nilotinib 50 nM + Asciminib 100 nM  | 96                      | 3                           | 3                   | Native BCR-ABL1<br>F359I | 2<br>1 | 66.7<br>33.3                   | ---<br>100                         |
| Nilotinib 100 nM + Asciminib 10 nM  | 96                      | 4                           | 4                   | Native BCR-ABL1<br>T315I | 3<br>1 | 75<br>25                       | ---<br>100                         |
| Nilotinib 100 nM + Asciminib 25 nM  | 96                      | 7                           | 7                   | Native BCR-ABL1<br>T315I | 2<br>5 | 28.6<br>71.4                   | ---<br>100                         |
| Nilotinib 100 nM + Asciminib 50 nM  | 96                      | 2                           | 2                   | Native BCR-ABL1<br>T315I | 1<br>1 | 50<br>50                       | ---<br>100                         |
| Nilotinib 100 nM + Asciminib 100 nM | 96                      | 2                           | 2                   | Native BCR-ABL1          | 2      | 100                            | ---                                |
| Nilotinib 200 nM + Asciminib 10 nM  | 96                      | 6                           | 5                   | Native BCR-ABL1          | 1      | 20                             | ---                                |
|                                     |                         |                             |                     | Y253H                    | 1      | 20                             | 25                                 |
|                                     |                         |                             |                     | T315I                    | 2      | 40                             | 50                                 |
|                                     |                         |                             |                     | F359C                    | 1      | 20                             | 25                                 |
| Nilotinib 200 nM + Asciminib 25 nM  | 96                      | 3                           | 3                   | T315I                    | 3      | 100                            | 100                                |
| Nilotinib 200 nM + Asciminib 50 nM  | 96                      | 1                           | 1                   | Native BCR-ABL1          | 1      | 100                            | ---                                |
| Nilotinib 200 nM + Asciminib 100 nM | 96                      | 1                           | 1                   | Native BCR-ABL1          | 1      | 100                            | ---                                |
| Ponatinib 2.5 nM + Asciminib 10 nM  | 96                      | 4                           | 4                   | Native BCR-ABL1          | 4      | 100                            | ---                                |
| Ponatinib 2.5 nM + Asciminib 25 nM  | 96                      | 1                           | 1                   | Native BCR-ABL1          | 1      | 100                            | ---                                |
| Ponatinib 2.5 nM + Asciminib 50 nM  | 96                      | 2                           | 2                   | Native BCR-ABL1          | 2      | 100                            | ---                                |
| Ponatinib 2.5 nM + Asciminib 100 nM | 96                      | 1                           | 1                   | Native BCR-ABL1          | 1      | 100                            | ---                                |
| Ponatinib 5 nM + Asciminib 10 nM    | 96                      | 2                           | 2                   | Native BCR-ABL1          | 2      | 100                            | ---                                |
| Ponatinib 5 nM + Asciminib 25 nM    | 96                      | 1                           | 1                   | Native BCR-ABL1          | 1      | 100                            | ---                                |
| Ponatinib 5 nM + Asciminib 50 nM    | 96                      | 3                           | 3                   | Native BCR-ABL1          | 3      | 100                            | ---                                |
| Ponatinib 5 nM + Asciminib 100 nM   | 96                      | 0                           | 0                   | ---                      | ---    | ---                            | ---                                |
| Ponatinib 10 nM + Asciminib 10 nM   | 96                      | 4                           | 4                   | Native BCR-ABL1          | 4      | 100                            | ---                                |
| Ponatinib 10 nM + Asciminib 25 nM   | 96                      | 1                           | 1                   | Native BCR-ABL1          | 1      | 100                            | ---                                |
| Ponatinib 10 nM + Asciminib 50 nM   | 96                      | 1                           | 1                   | Native BCR-ABL1          | 1      | 100                            | ---                                |



|                                       |    |   |   |                 |   |     |     |
|---------------------------------------|----|---|---|-----------------|---|-----|-----|
| Ponatinib 10 nM +<br>Asciminib 100 nM | 96 | 1 | 1 | Native BCR-ABL1 | 1 | 100 | --- |
|---------------------------------------|----|---|---|-----------------|---|-----|-----|

**Table S5. Summary of baseline characteristics of asciminib-treated patients surveyed by BCR-ABL1 deep sequencing, related to Figure 4.**

| Patient | Previous TKI(s) failed                    | Disease phase | Baseline BCR-ABL1 sequencing                                  | Baseline BCR-ABL1 transcripts (% I.S.) | Last follow-up BCR-ABL1 sequencing (Day, VAF %)                             | Last follow-up BCR-ABL1 transcripts (Day, % I.S.) |
|---------|-------------------------------------------|---------------|---------------------------------------------------------------|----------------------------------------|-----------------------------------------------------------------------------|---------------------------------------------------|
| 1       | Nilotinib, Dasatinib                      | CML-CP        | F359V (79.1%)<br>T315I (20.6%)                                | 22.6%                                  | Day 673:<br>F359V (98.0%)                                                   | Day 673:<br>24.7%                                 |
| 2       | Radotinib, Imatinib, Dasatinib            | CML-CP        | T315I (29.3%)                                                 | 81.0%                                  | Day 589:<br>F359I (45.8%)<br>T315I (39.7%)<br>A433D (11.3%)<br>P112S (2.7%) | Day 589:<br>89.1%                                 |
| 3       | Imatinib, Bosutinib                       | CML-CP        | T315I (76.5%)<br>A337T (3.3%)<br>G250E (2.2%)<br>G463D (2.2%) | 42.0%                                  | Day 469:<br>F359I (99.0%)                                                   | Day 469:<br>26.0%                                 |
| 4       | Imatinib, Nilotinib, Dasatinib, Radotinib | CML-CP        | F317L (100%)                                                  | 87.7%                                  | Day 505:<br>F317L (99.0%)                                                   | Day 505:<br>0.1%                                  |
| 5       | Imatinib, Dasatinib, Nilotinib, Ponatinib | CML-CP        | E355G (99.6%)<br>T315I (99.4%)<br>E238D (2.1%)                | 6.3%                                   | Day 224:<br>E355G (99.6%)<br>T315I (99.5%)                                  | Day 224:<br>31.0%                                 |
| 6       | Imatinib, Dasatinib, Nilotinib, Bosutinib | CMP-AP        | E279K (42.2%)<br>E238D (2.2%)<br>N297T (2.2%)<br>D233A (2.0%) | 82.0%                                  | Day 294:<br>E279K (97.8%)<br>Y353C (3.5%)                                   | Day 294:<br>73.0%                                 |

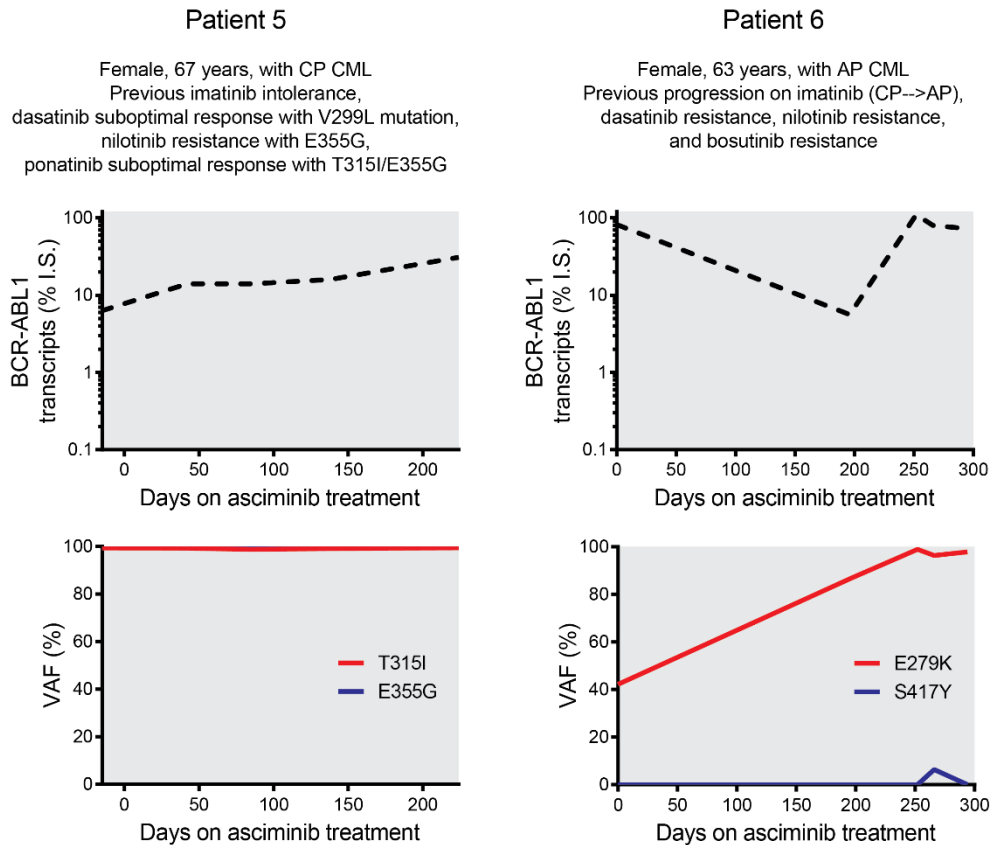

**Figure S4. Summary of clinical response and *BCR-ABL1* deep sequencing in two additional patients treated with asciminib, related to Figure 4.** Among the six asciminib-treated patients profiled in this study, two (Patients 5 and 6) showed evidence of *BCR-ABL1* mutations that expanded or persisted at high levels at the time of relapse or a suboptimal response. Molecular labs for *BCR-ABL1* transcripts (upper panels) along with matching *BCR-ABL1* mutations identified by NGS-based sequencing (lower panels) are shown at multiple timepoints over the course of treatment.

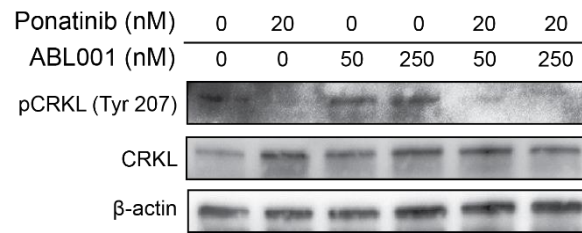

**Figure S5. Immunoblot analysis of primary CML patient cells harboring the BCR-ABL1<sup>F359I</sup> mutant following *ex vivo* treatment with asciminib alone and in combination with ponatinib, related to Figure 4.** Primary mononuclear cells from a patient with CML-CP harboring the BCR-ABL1<sup>F359I</sup> mutant were treated *ex vivo* with ponatinib, asciminib, or the combination at the indicated concentrations overnight, then lysed and analyzed by Western blot for effects on CRKL phosphorylation, as a biomarker for BCR-ABL1 kinase activity.

**Table S6. Cellular proliferation IC<sub>50</sub> values for asciminib for all Ba/F3 BCR-ABL1 compound mutant cell lines, related to Figure 6.**

| Cell line                  | Vector       | Asciminib IC <sub>50</sub> , nM |
|----------------------------|--------------|---------------------------------|
| Ba/F3 BCR-ABL1 G250E/T315I | MIG          | >2500                           |
| Ba/F3 BCR-ABL1 Y253H/T315I | MIG          | >2500                           |
| Ba/F3 BCR-ABL1 E255V/V299L | MIG          | >2500                           |
| Ba/F3 BCR-ABL1 E255V/T315I | MIG          | >2500                           |
| Ba/F3 BCR-ABL1 V299L/F317L | MIG          | >2500                           |
| Ba/F3 BCR-ABL1 T315I/M351T | MIG          | >2500                           |
| Ba/F3 BCR-ABL1 T315I/H396R | MIG          | >2500                           |
| Ba/F3 BCR-ABL1 T315I/E453K | MIG          | >2500                           |
| Ba/F3 BCR-ABL1 T315L       | MIG          | >2500                           |
| Ba/F3 BCR-ABL1 T315M       | MIG          | >2500                           |
| Ba/F3 BCR-ABL1 F317L/F359V | MIG          | >2500                           |
| Ba/F3 BCR-ABL1 G250E/T315I | pSR $\alpha$ | >10000                          |
| Ba/F3 BCR-ABL1 E255K/T315I | pSR $\alpha$ | >10000                          |
| Ba/F3 BCR-ABL1 E255V/T315I | pSR $\alpha$ | >10000                          |

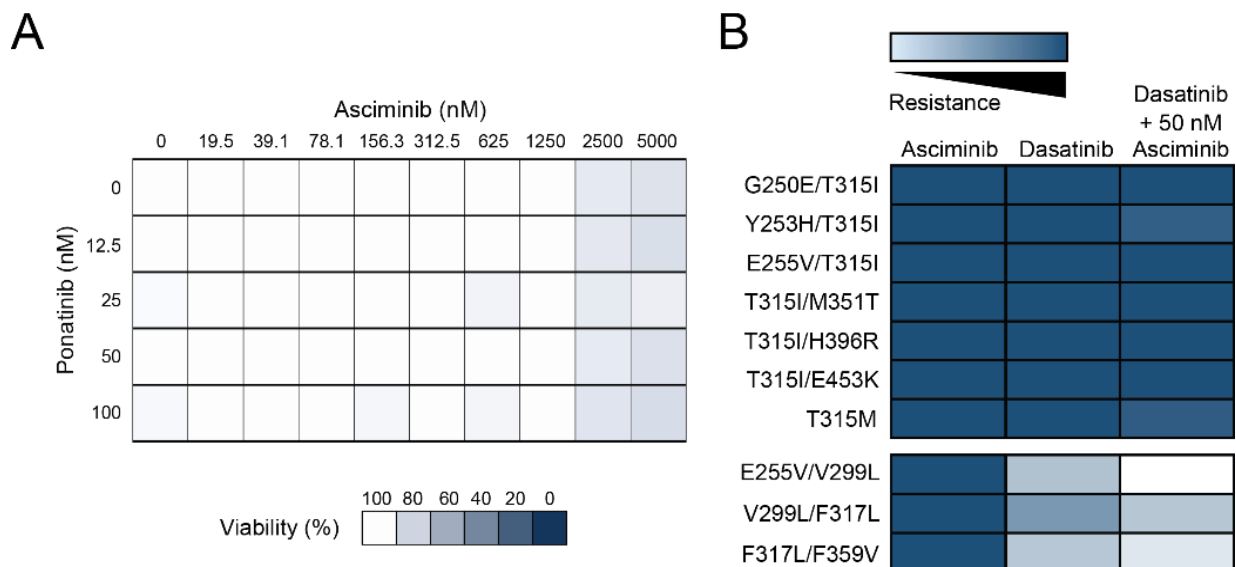

**Figure S6. Asciminib plus ponatinib is non-toxic to parental Ba/F3 cells and asciminib plus dasatinib is ineffective against T315I-inclusive BCR-ABL1 compound mutants, related to Figure 6. (A)** Ba/F3 parental cells were cultured in complete medium supplemented with WEHI-3B-conditioned medium as a source of IL-3 and distributed into 384-well plates in the presence of the indicated matrix of concentrations of asciminib and ponatinib alone and in combination. After a 72 hr incubation, plates were analyzed by standard MTS-based colorimetric assay. Absorbance was averaged across a replicates, and viability was normalized to untreated wells. **(B)** Ba/F3 cells expressing the indicated MIG BCR-ABL1 compound mutants were distributed into 96-well plates in the presence of graded concentrations of asciminib alone (0-2500 nM), dasatinib alone (0-768 nM), or graded dasatinib combined with 50 nM asciminib. Cells were cultured for 72 h and analyzed by MTS-based colorimetric assay.  $IC_{50}$  values were calculated based on non-linear regression using Prism software and displayed as a sensitivity heatmap, wherein a color scale from white to dark blue indicates increased resistance. Data was summarized from at least three independent experiments performed in quadruplicate.

**Table S7. Summary of cell-based resistance screen for combinations of asciminib and ponatinib starting from Ba/F3 pSR $\alpha$  BCR-ABL1<sup>T315I</sup> cells, related to Figure 6.**

| Treatment condition                  | Total wells surveyed, n | Wells with outgrowth, n (%) | Clones sequenced, n | Mutant(s) recovered       | n      | Frequency among all clones (%) | Frequency among compound mutant clones (%) |
|--------------------------------------|-------------------------|-----------------------------|---------------------|---------------------------|--------|--------------------------------|--------------------------------------------|
| Ponatinib 20 nM + Asciminib 200 nM   | 96                      | 0                           | 0                   | ---                       | ---    | ---                            | ---                                        |
| Ponatinib 20 nM + Asciminib 400 nM   | 96                      | 3                           | 1                   | Y253H/T315I               | 1      | 100                            | 100                                        |
| Ponatinib 20 nM + Asciminib 800 nM   | 96                      | 1                           | 0                   | ---                       | ---    | ---                            | ---                                        |
| Ponatinib 20 nM + Asciminib 1600 nM  | 96                      | 4                           | 4                   | T315I only<br>Q252H/T315I | 2<br>2 | 50<br>50                       | ---<br>100                                 |
| Ponatinib 40 nM + Asciminib 200 nM   | 96                      | 0                           | 0                   | ---                       | ---    | ---                            | ---                                        |
| Ponatinib 40 nM + Asciminib 400 nM   | 96                      | 1                           | 1                   | T315I only                | 1      | 100                            | ---                                        |
| Ponatinib 40 nM + Asciminib 800 nM   | 96                      | 0                           | 0                   | ---                       | ---    | ---                            | ---                                        |
| Ponatinib 40 nM + Asciminib 1600 nM  | 96                      | 1                           | 1                   | E255V/T315I               | 1      | 100                            | 100                                        |
| Ponatinib 80 nM + Asciminib 200 nM   | 96                      | 0                           | 0                   | ---                       | ---    | ---                            | ---                                        |
| Ponatinib 80 nM + Asciminib 400 nM   | 96                      | 0                           | 0                   | ---                       | ---    | ---                            | ---                                        |
| Ponatinib 80 nM + Asciminib 800 nM   | 96                      | 0                           | 0                   | ---                       | ---    | ---                            | ---                                        |
| Ponatinib 80 nM + Asciminib 1600 nM  | 96                      | 0                           | 0                   | ---                       | ---    | ---                            | ---                                        |
| Ponatinib 160 nM + Asciminib 200 nM  | 96                      | 0                           | 0                   | ---                       | ---    | ---                            | ---                                        |
| Ponatinib 160 nM + Asciminib 400 nM  | 96                      | 0                           | 0                   | ---                       | ---    | ---                            | ---                                        |
| Ponatinib 160 nM + Asciminib 800 nM  | 96                      | 0                           | 0                   | ---                       | ---    | ---                            | ---                                        |
| Ponatinib 160 nM + Asciminib 1600 nM | 96                      | 0                           | 0                   | ---                       | ---    | ---                            | ---                                        |

**Table S8. Summary of cell-based resistance screen for combinations of asciminib and ponatinib starting from Ba/F3 MIG BCR-ABL1<sup>T315I</sup> cells, related to Figure 6.**

| Treatment condition                 | Total wells surveyed, n | Wells with outgrowth, n (%) | Clones sequenced, n | Mutant(s) recovered | n  | Frequency among all clones (%) | Frequency among compound mutant clones (%) |
|-------------------------------------|-------------------------|-----------------------------|---------------------|---------------------|----|--------------------------------|--------------------------------------------|
| Ponatinib 40 nM + Asciminib 40 nM   | 192                     | 127                         | 127                 | T315I only          | 13 | 10.2                           | ---                                        |
|                                     |                         |                             |                     | Q252H/Y253F/T315I   | 1  | 0.8                            | 0.9                                        |
|                                     |                         |                             |                     | Q252H / T315I       | 17 | 13.4                           | 14.9                                       |
|                                     |                         |                             |                     | Y253H / T315I       | 27 | 21.3                           | 23.7                                       |
|                                     |                         |                             |                     | E255K / T315I       | 3  | 2.4                            | 2.6                                        |
|                                     |                         |                             |                     | E255V / T315I       | 5  | 3.9                            | 4.4                                        |
|                                     |                         |                             |                     | E279K/T315I/E462K   | 1  | 0.8                            | 0.9                                        |
|                                     |                         |                             |                     | K285N / T315I       | 3  | 2.4                            | 2.6                                        |
|                                     |                         |                             |                     | E292V / T315I       | 1  | 0.8                            | 0.9                                        |
|                                     |                         |                             |                     | F311I / T315I       | 20 | 15.7                           | 17.5                                       |
|                                     |                         |                             |                     | F311V / T315I       | 6  | 4.7                            | 5.3                                        |
|                                     |                         |                             |                     | T315I / V339A       | 1  | 0.8                            | 0.9                                        |
|                                     |                         |                             |                     | T315I / E355G       | 4  | 3.1                            | 3.5                                        |
|                                     |                         |                             |                     | T315I / F359C       | 4  | 3.1                            | 3.5                                        |
|                                     |                         |                             |                     | T315I / F359I       | 5  | 3.9                            | 4.4                                        |
|                                     |                         |                             |                     | T315I/L387F M388L   | 1  | 0.8                            | 0.9                                        |
|                                     |                         |                             |                     | T315I / H396P       | 4  | 3.1                            | 3.5                                        |
| T315I/E459K/E462K                   | 1                       | 0.8                         | 0.9                 |                     |    |                                |                                            |
| T315I / P465S                       | 9                       | 7.1                         | 7.9                 |                     |    |                                |                                            |
| T315I / F486S                       | 1                       | 0.8                         | 0.9                 |                     |    |                                |                                            |
| Ponatinib 80 nM + Asciminib 80 nM   | 192                     | 54                          | 54                  | T315I only          | 50 | 92.6                           | ---                                        |
|                                     |                         |                             |                     | Q252H/E255K/T315I   | 1  | 1.9                            | 25.0                                       |
|                                     |                         |                             |                     | Y253H / T315I       | 1  | 1.9                            | 25.0                                       |
|                                     |                         |                             |                     | E255V / T315I       | 1  | 1.9                            | 25.0                                       |
|                                     |                         |                             |                     | T315I / E462K       | 1  | 1.9                            | 25.0                                       |
| Ponatinib 160 nM + Asciminib 160 nM | 192                     | 33                          | 33                  | T315I only          | 33 | 100                            | ---                                        |



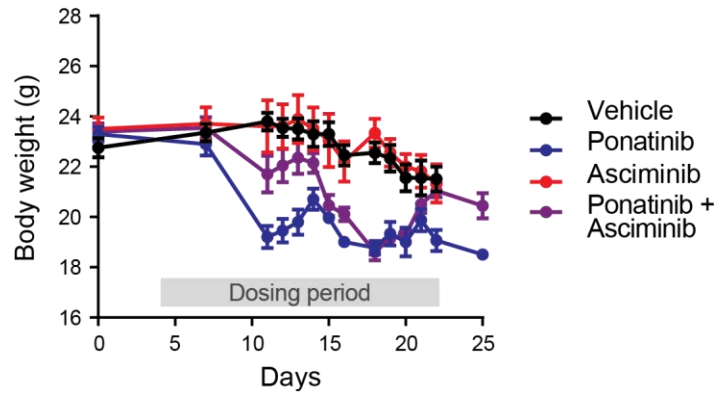

**Figure S7. Body weight summary following in vivo combination treatment with asciminib and ponatinib in a T315I-inclusive BCR-ABL1 compound mutant-driven mouse model, related to Figure 7.** Female Nod-SCID mice were injected by tail vein with Ba/F3 pMIG-BCR-ABL1<sup>T315I/H396R</sup> cells and after 3 days commenced oral drug treatment with vehicle, asciminib (30 mg/kg), ponatinib (25 mg/kg), or the combination once daily (n=10 mice/group). Body weight for all animals was measured over the course of 25 days, and the graph shows the mean weight  $\pm$  SEM. Dosing was held if mice lost >10% of body weight and maintained this loss on two consecutive days or if a mouse lost 4 grams in 24 hours. Mice were re-enrolled if they gained two grams or more.
